# Supplementary material
Source: ML conference proceedings conference paper supplement (https://aclanthology.org/2024.semeval-1.243)
Supplement: SupplementaryMaterial [file 2024.semeval-1.243.SupplementaryMaterial.zip]

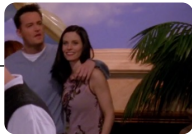

**Chandler:**  
Hey Pheebs!

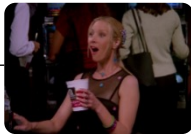

**Phoebe:**  
Ohh! You made up!

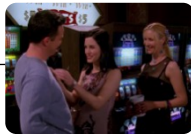

**Monica:**  
Yeah, I couldn't be mad  
at him for too long.

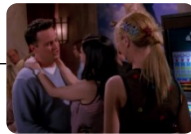

**Chandler:**  
Yeah, she couldn't live  
without the Chan Love.

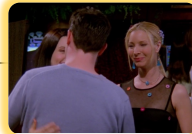

**Phoebe:**  
Ohh, get a room.

Utterance 1

Joy

cause

Utterance 2

Surprise

cause

Utterance 3

Joy

cause

Utterance 4

Joy

cause

Utterance 5

Disgust

cause

cause
