# Supplementary material
Source: ML conference proceedings conference paper supplement (https://aclanthology.org/2024.semeval-1.243)
Supplement: SupplementaryMaterial [file 2024.semeval-1.243.SupplementaryMaterial.zip]

## The Annotation System for Multimodal Emotion-Cause Pair Extraction in Conversations

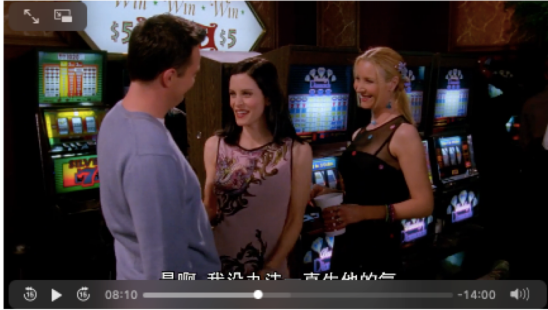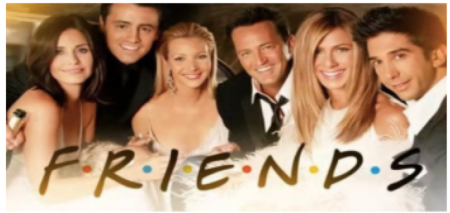

Season ID:  Episode ID:  [View](#)

Conversation List: [805](#) [806](#) [807](#) [808](#) [809](#) [810](#) [811](#) [812](#) [813](#) [814](#) [815](#)

| Con_ID | Utt_ID | Start Time  | End Time    | Speaker  | Utterance                                      | Emotion  | Annotation                  |
|--------|--------|-------------|-------------|----------|------------------------------------------------|----------|-----------------------------|
| 807    | 0      | 0:08:00,313 | 0:08:04,065 | Phoebe   | Get out of here you lurker! Go on! Get!        | anger    | <a href="#">E-C Pairing</a> |
| 807    | 1      | 0:08:06,110 | 0:08:06,528 | Chandler | Hey Pheebs!                                    | joy      | <a href="#">E-C Pairing</a> |
| 807    | 2      | 0:08:06,528 | 0:08:09,007 | Phoebe   | Ohh! You made up!                              | surprise | <a href="#">E-C Pairing</a> |
| 807    | 3      | 0:08:09,614 | 0:08:11,698 | Monica   | Yeah, I couldn't be mad at him for too long.   | joy      | <a href="#">E-C Pairing</a> |
| 807    | 4      | 0:08:11,991 | 0:08:20,290 | Chandler | Yeah, she couldn't live without the Chan Love. | joy      | <a href="#">E-C Pairing</a> |
| 807    | 5      | 0:08:18,122 | 0:08:20,290 | Phoebe   | Ohh, get a room.                               | disgust  | <a href="#">E-C Pairing</a> |
| 807    | 6      | 0:08:20,500 | 0:08:21,682 | Monica   | We have one.                                   | neutral  | <a href="#">E-C Pairing</a> |
| 807    | 7      | 0:08:21,682 | 0:08:22,506 | Phoebe   | I know. Use it.                                | neutral  | <a href="#">E-C Pairing</a> |

| Emo_ID | Emotion  | Cause_ID | Cause Span                             | Cause Type | No-Cause Type        | Confidence | Comment              | Operation                                     |
|--------|----------|----------|----------------------------------------|------------|----------------------|------------|----------------------|-----------------------------------------------|
| 0      | anger    | 0        |                                        | E-V        | <input type="text"/> | 4          | <input type="text"/> | <a href="#">Update</a> <a href="#">Delete</a> |
| 0      | anger    | 0        | Get out of here you lurker!            | E          | <input type="text"/> | 4          | <input type="text"/> | <a href="#">Update</a> <a href="#">Delete</a> |
| 1      | joy      | 1        | Hey Pheebs!                            | G          | <input type="text"/> | 5          | <input type="text"/> | <a href="#">Update</a> <a href="#">Delete</a> |
| 2      | surprise | 2        | You made up!                           | E          | <input type="text"/> | 5          | <input type="text"/> | <a href="#">Update</a> <a href="#">Delete</a> |
| 3      | joy      | 2        | You made up!                           | E          | <input type="text"/> | 5          | <input type="text"/> | <a href="#">Update</a> <a href="#">Delete</a> |
| 4      | joy      | 2        | You made up!                           | E          | <input type="text"/> | 5          | <input type="text"/> | <a href="#">Update</a> <a href="#">Delete</a> |
| 4      | joy      | 3        | I couldn't be mad at him for too long. | O          | <input type="text"/> | 5          | <input type="text"/> | <a href="#">Update</a> <a href="#">Delete</a> |
| 5      | disgust  | 5        |                                        | E-V        | <input type="text"/> | 5          | kissing              | <a href="#">Update</a> <a href="#">Delete</a> |

[Next Conversation](#)
