# Supplementary material
Source: ML conference proceedings conference paper supplement (https://aclanthology.org/2024.semeval-1.243)
Supplement: SupplementaryMaterial [file 2024.semeval-1.243.SupplementaryMaterial.zip]

## Embedding Extraction

## Cause Pair Extraction and Emotion Classification

## Cause Extraction After Finding Pairs

Optional

Source (1)  
Embedding Provider

Source (2)  
Embedding Provider

Source (3)  
Embedding Provider

Classifier

Logits  
to  
Label

logits

emotions

concatenation

Upper Level  
Positional Embedder  
(Transformer-Based)

Cause Pair Matrix

Cause Pair Question and Answers

Q & C

Q & C

Q & C

Emotion Cause  
Extractor  
(QA)

sub-text

sub-text

sub-text

Using a transformer-based model to deliver sequentially enriched presentations
